# Supplementary material
Source: PubMed Central journal article supplement (PMC6207099)

## Supplementary Figures

### Supplementary Figure 1.

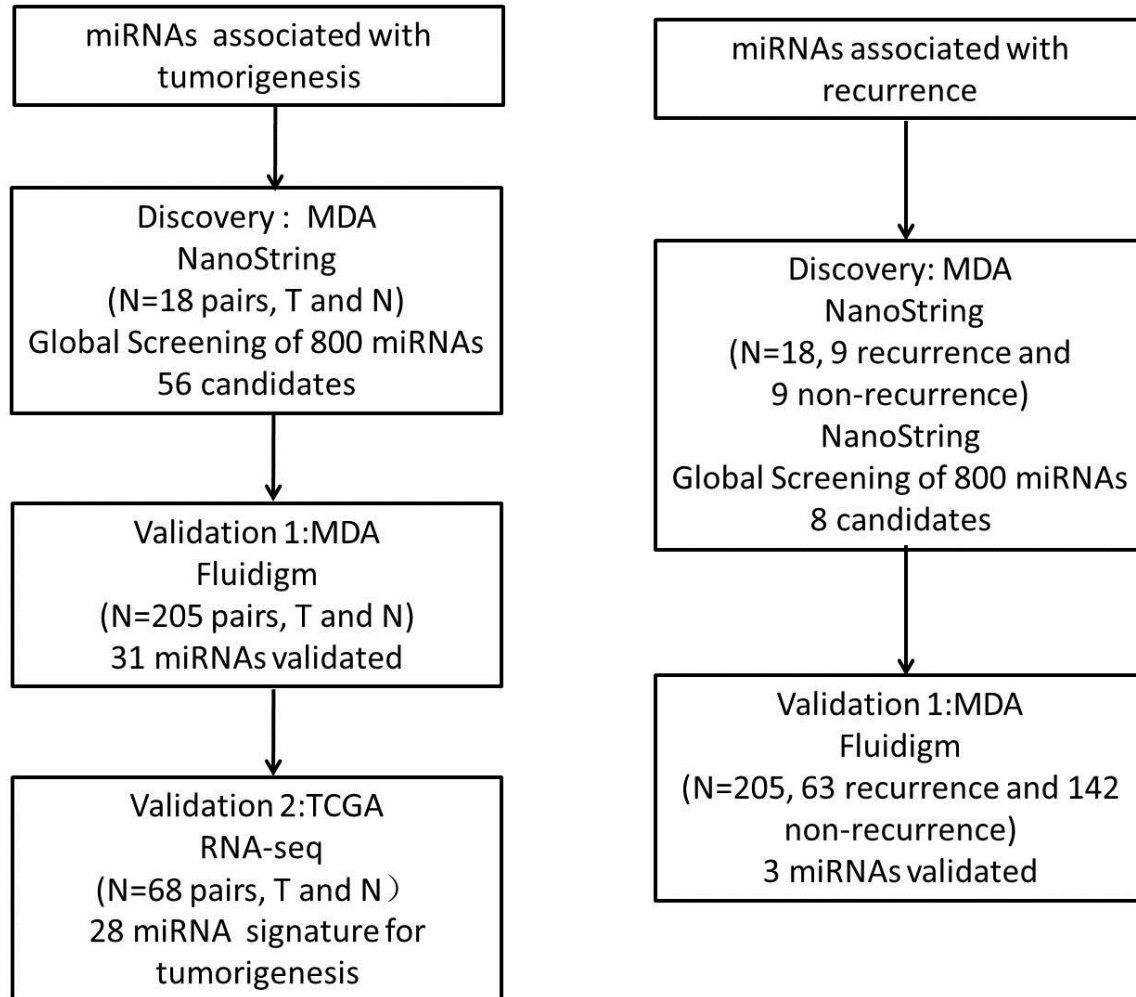

Supplement: mmc1.pdf [file mmc1.pdf]

**Supplementary Figure 3.**

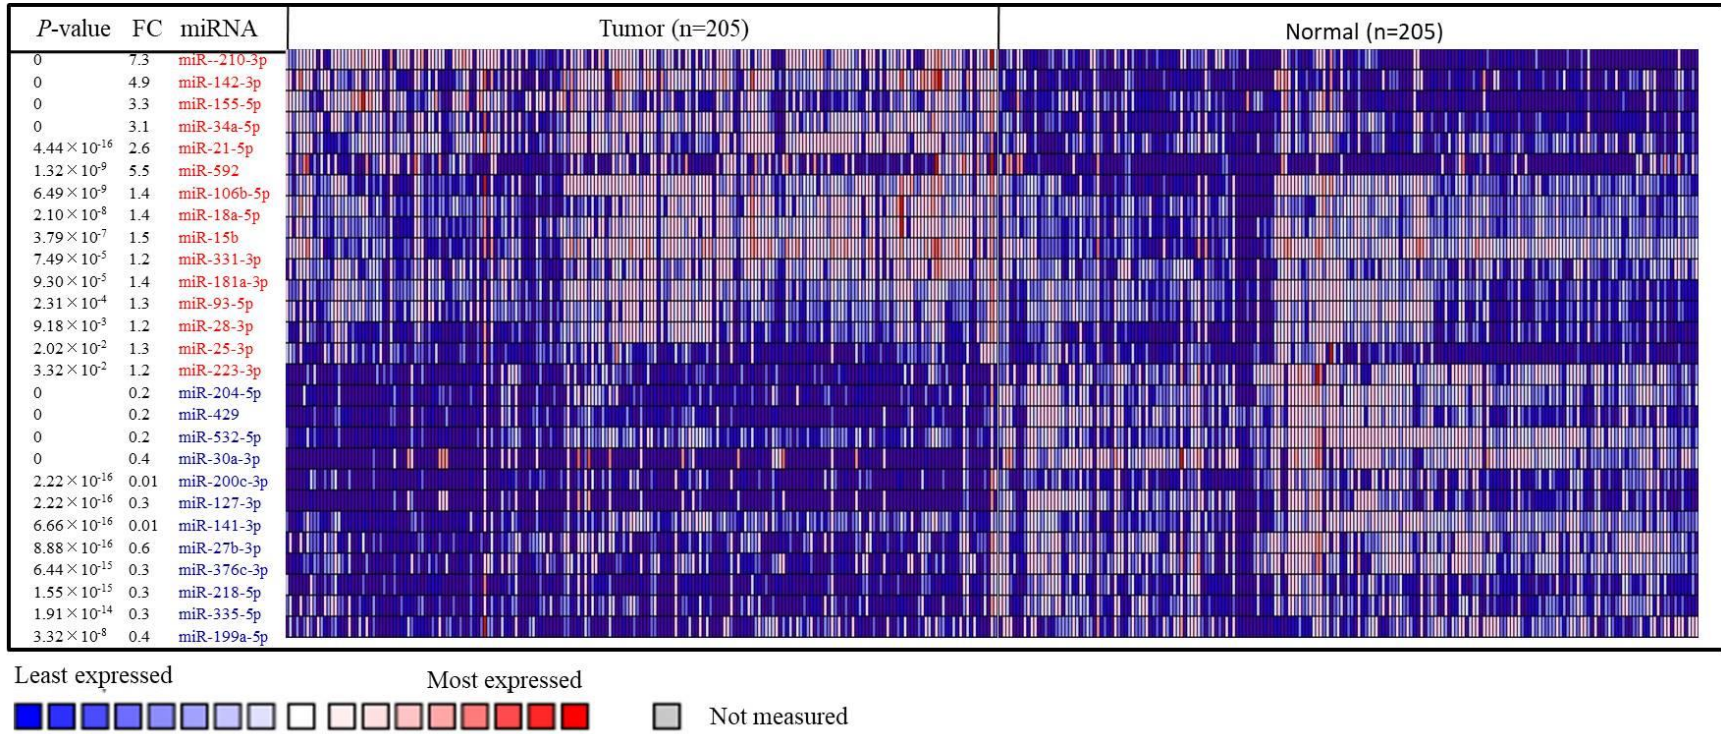

Supplement: mmc3.pdf [file mmc3.pdf]

**Supplementary Figure 4.**

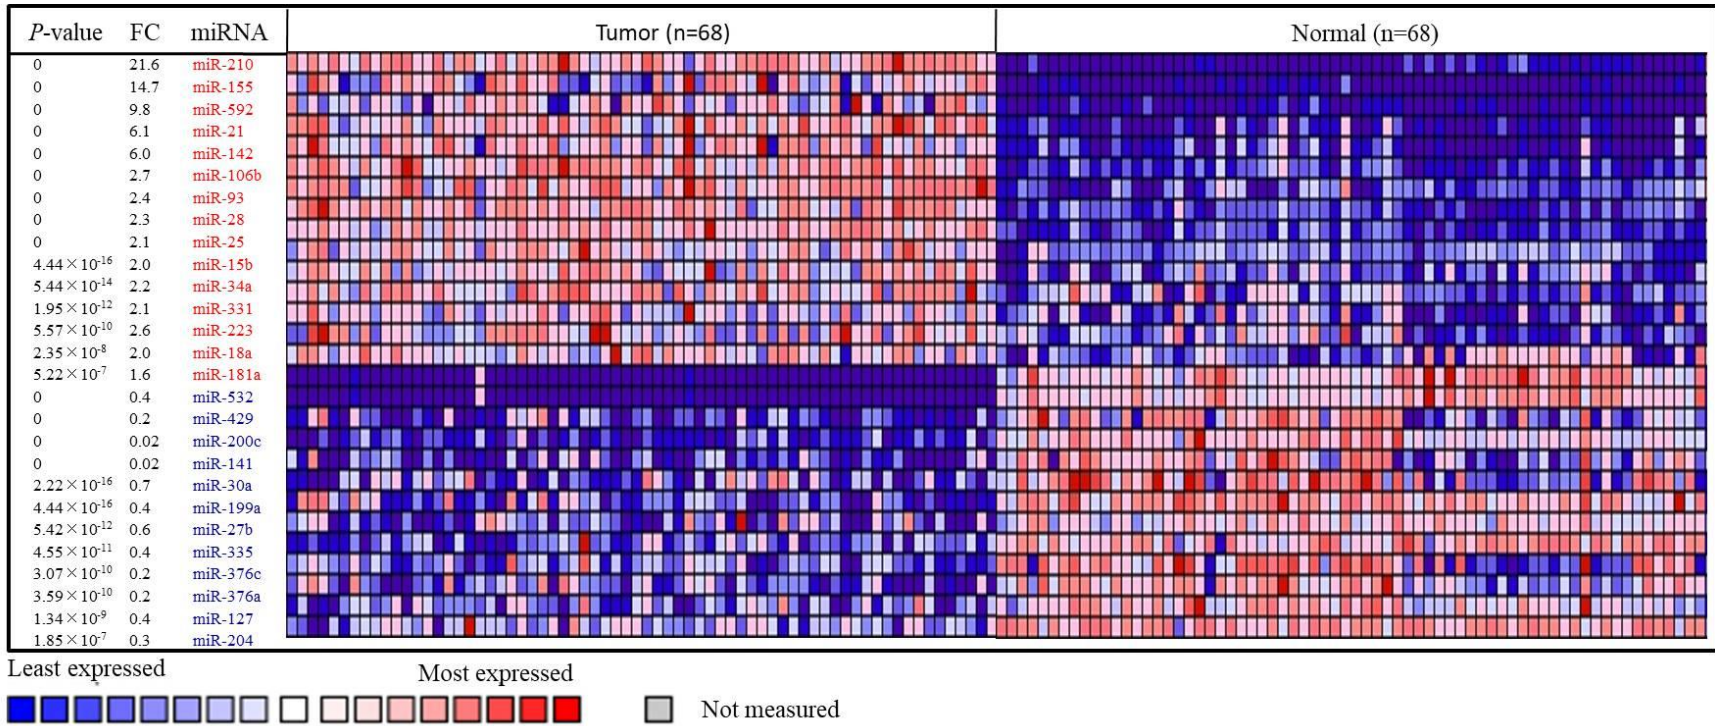

Supplement: mmc4.pdf [file mmc4.pdf]

Supplementary Figure 5.

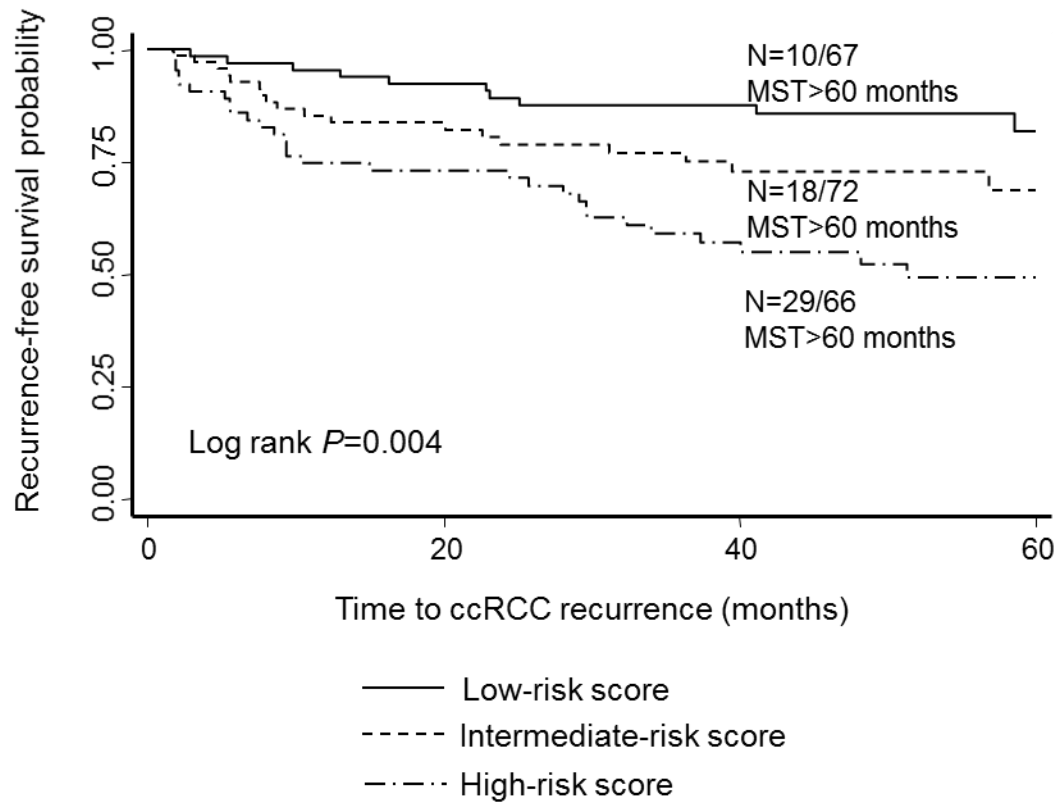

Supplement: mmc5.pdf [file mmc5.pdf]
